# Supplementary material
Source: ML conference proceedings conference paper supplement (https://openaccess.thecvf.com/content/WACV2023/html/Suomela_Benchmarking_Visual_Localization_WACV_2023_paper.html)
Supplement: Supplementary file 1 [file Suomela_Benchmarking_Visual_Localization_WACV_2023_supplemental.pdf]

## A. Additional experiment results

This appendix includes the full set of results for each experiment type: illumination change, viewpoint change and weather change. For each experiment, we show

- 1) Plot of failure rate vs. the main experiment parameter;
- 2) Correlation plot of the failure and recall rates;
- 3) Table of the failure rates for each value of the main experiment parameter;
- 4) Table of the recall rates measured by driving the route by autopilot with access to ground truth vehicle state;

For the illumination change we show results from two environments (Town01 and Town10). The viewpoint experiments were conducted only in Town01, the weather experiments in Town10. For full experiment specifications see the main paper.

### A.1. Illumination change results - Town01

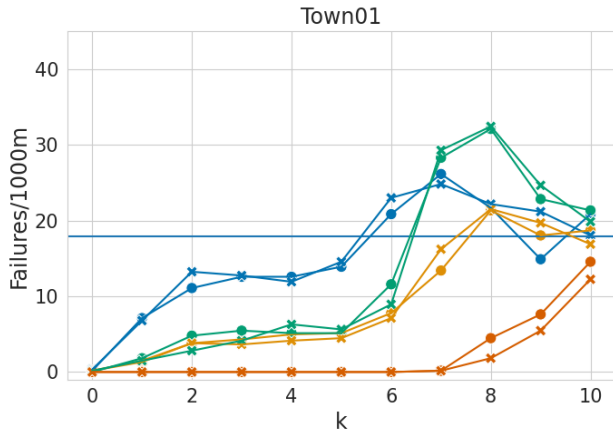

Figure A.1.1: Relationship of failure rate with illumination levels  $k$ . Marker color indicates type for local features, shape for global features.

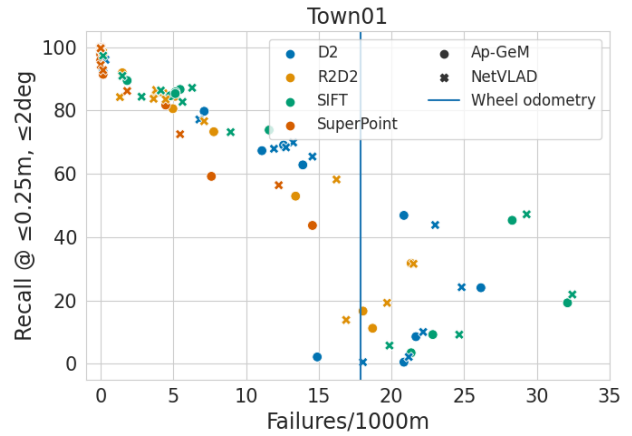

Figure A.1.2: Relationship between the failure rate and recall rate T1. Marker color and shape indicate feature type.

|                |            | Town01     |            |            |            |            |            |            |            |            |            |             |
|----------------|------------|------------|------------|------------|------------|------------|------------|------------|------------|------------|------------|-------------|
| PR             | LF         | $k = 0$    | 1          | 2          | 3          | 4          | 5          | 6          | 7          | 8          | 9          | 10          |
| Ap-GeM         | Sift       | <b>0.0</b> | 1.8        | 4.8        | 5.5        | 5.1        | 5.1        | 11.6       | 28.3       | 32.1       | 22.8       | 21.4        |
|                | D2-net     | 0.2        | 7.1        | 11.1       | 12.6       | 12.6       | 13.9       | 20.9       | 26.2       | 21.7       | 14.9       | 20.9        |
|                | R2D2       | 0.2        | 1.5        | 3.8        | 4.3        | 5.0        | 5.1        | 7.8        | 13.4       | 21.4       | 18.0       | 18.7        |
|                | SuperPoint | <b>0.0</b> | <b>0.2</b> | 4.5        | 7.6        | 14.6        |
| Net-VLAD       | Sift       | 0.2        | 1.5        | 2.8        | 4.1        | 6.3        | 5.6        | 8.9        | 29.3       | 32.5       | 24.7       | 19.9        |
|                | D2-net     | 0.3        | 6.8        | 13.2       | 12.7       | 11.9       | 14.6       | 23.0       | 24.8       | 22.2       | 21.2       | 18.0        |
|                | R2D2       | 0.2        | 1.3        | 3.8        | 3.6        | 4.1        | 4.5        | 7.1        | 16.2       | 21.5       | 19.7       | 16.9        |
|                | SuperPoint | <b>0.0</b> | <b>0.2</b> | <b>1.8</b> | <b>5.5</b> | <b>12.3</b> |
| Wheel odometry |            |            |            |            |            | 17.9       |            |            |            |            |            |             |

Table A.1.1: Navigation failure rates over 5 repeated runs of the same route at each illumination level  $k$ . Smaller is better. PR = place recognition method, LF = local feature type.

|          |            | Town01                       |                              |                            |                              |                             |                             |                           |                           |                           |                           |                           |
|----------|------------|------------------------------|------------------------------|----------------------------|------------------------------|-----------------------------|-----------------------------|---------------------------|---------------------------|---------------------------|---------------------------|---------------------------|
| PR       | LF         | $k = 0$                      | 1                            | 2                          | 3                            | 4                           | 5                           | 6                         | 7                         | 8                         | 9                         | 10                        |
|          |            | T1 / T2 / T3                 | T1 / T2 / T3                 | T1 / T2 / T3               | T1 / T2 / T3                 | T1 / T2 / T3                | T1 / T2 / T3                | T1 / T2 / T3              | T1 / T2 / T3              | T1 / T2 / T3              | T1 / T2 / T3              | T1 / T2 / T3              |
| Ap-GeM   | Sift       | 98.0 / 98.2 / 99.8           | 89.5 / 92.9 / 99.0           | 84.7 / 89.6 / 96.5         | 86.7 / 89.3 / 96.1           | 85.9 / 89.3 / 96.7          | 85.4 / 89.5 / 95.4          | 73.8 / 78.5 / 90.5        | 45.3 / 51.6 / 63.9        | 19.2 / 23.8 / 29.8        | 9.2 / 11.8 / 16.4         | 3.5 / 5.8 / 8.6           |
|          | D2-net     | 92.3 / 95.7 / 99.8           | 79.8 / 86.7 / 97.5           | 67.3 / 74.7 / 90.1         | 68.8 / 74.8 / 90.1           | 69.1 / 74.7 / 88.0          | 62.8 / 70.9 / 85.7          | 46.9 / 58.1 / 73.8        | 24.0 / 28.5 / 39.3        | 8.6 / 10.9 / 15.6         | 2.1 / 3.1 / 6.2           | 0.5 / 0.8 / 2.0           |
|          | R2D2       | 98.0 / 98.4 / <b>100.0</b>   | 91.9 / 94.1 / 98.7           | 85.5 / 90.4 / 97.7         | 85.7 / 90.6 / 96.2           | 80.6 / 88.2 / 97.0          | 84.5 / 88.0 / 96.5          | 73.3 / 79.7 / 93.6        | 53.0 / 62.8 / 79.1        | 31.7 / 37.5 / 50.5        | 16.6 / 20.4 / 23.6        | 11.2 / 12.9 / 15.0        |
|          | SuperPoint | <b>100.0 / 100.0 / 100.0</b> | <b>100.0 / 100.0 / 100.0</b> | <b>99.8 / 99.8 / 99.8</b>  | 97.7 / 99.8 / <b>100.0</b>   | 99.5 / <b>100.0 / 100.0</b> | 99.2 / 99.3 / 99.7          | <b>95.9 / 98.5 / 99.0</b> | 91.4 / 94.6 / 96.5        | 81.7 / 86.3 / 90.5        | 59.2 / 65.0 / 71.5        | 43.7 / 48.9 / 57.9        |
| Net-VLAD | Sift       | 97.4 / 98.5 / 99.8           | 91.0 / 93.3 / 99.2           | 84.4 / 87.7 / 97.5         | 86.3 / 89.5 / 96.9           | 87.2 / 89.8 / 97.4          | 82.7 / 87.5 / 96.5          | 73.2 / 79.6 / 92.3        | 47.2 / 53.1 / 67.6        | 21.9 / 27.0 / 34.4        | 9.2 / 13.8 / 20.5         | 5.8 / 8.2 / 13.0          |
|          | D2-net     | 96.1 / 96.9 / 99.7           | 77.2 / 85.1 / 98.7           | 69.9 / 75.8 / 90.1         | 68.4 / 74.8 / 90.0           | 67.9 / 75.7 / 87.3          | 65.5 / 71.9 / 86.3          | 43.8 / 52.4 / 75.0        | 24.2 / 29.9 / 42.6        | 10.0 / 13.0 / 17.9        | 2.1 / 4.4 / 8.0           | 0.5 / 1.2 / 1.8           |
|          | R2D2       | 98.4 / 98.5 / 99.7           | 84.3 / 91.8 / 98.7           | 86.5 / 91.0 / 97.5         | 83.7 / 87.0 / 97.2           | 86.2 / 89.5 / 97.5          | 83.5 / 87.3 / 96.2          | 76.6 / 82.4 / 93.1        | 58.2 / 66.1 / 83.1        | 31.6 / 37.7 / 49.2        | 19.2 / 22.2 / 27.6        | 13.8 / 15.3 / 18.3        |
|          | SuperPoint | <b>100.0 / 100.0 / 100.0</b> | 99.7 / 99.8 / <b>100.0</b>   | 99.7 / 99.7 / <b>100.0</b> | <b>100.0 / 100.0 / 100.0</b> | <b>99.8 / 100.0 / 100.0</b> | <b>99.7 / 100.0 / 100.0</b> | 94.4 / <b>99.2 / 99.5</b> | <b>92.8 / 96.7 / 99.7</b> | <b>86.2 / 90.8 / 96.1</b> | <b>72.5 / 78.1 / 87.2</b> | <b>56.4 / 60.4 / 68.1</b> |

Table A.1.2: The localization recall rates for the reference paths at illumination levels  $k$  with thresholds T1 ( $\leq 0.25m, \leq 2^\circ$ ), T2 ( $\leq 0.50m, \leq 5^\circ$ ) and T3 ( $\leq 5.00m, \leq 10^\circ$ ).

## A.2. Illumination change results - Town10

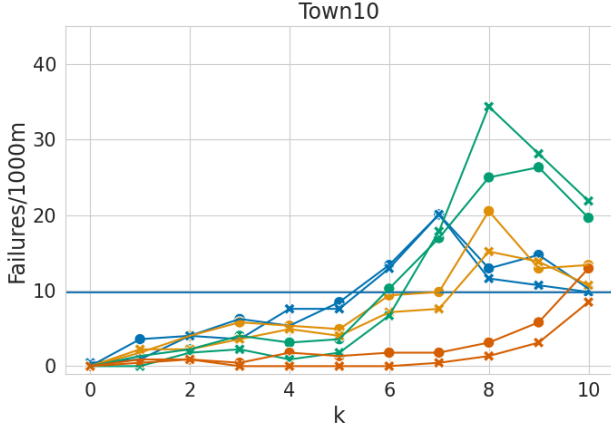

Figure A.2.1: Relationship of failure rate with illumination levels  $k$ . Marker color indicates type for local features, shape for global features.

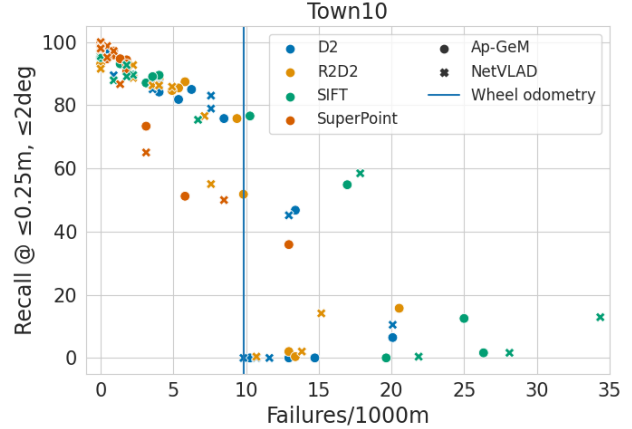

Figure A.2.2: Relationship between the failure rate and recall rate T1. Marker color and shape indicate feature type.

|                |            | Town10     |            |            |            |            |            |            |            |            |            |            |            |  |
|----------------|------------|------------|------------|------------|------------|------------|------------|------------|------------|------------|------------|------------|------------|--|
| PR             | LF         | $k = 0$    | 1          | 2          | 3          | 4          | 5          | 6          | 7          | 8          | 9          | 10         | CT         |  |
| Ap-GeM         | Sift       | <b>0.0</b> | 1.3        | 2.2        | 4.0        | 3.1        | 3.6        | 10.3       | 17.0       | 25.0       | 26.3       | 19.6       | 169        |  |
|                | D2-net     | <b>0.0</b> | 3.6        | 4.0        | 6.2        | 5.4        | 8.5        | 13.4       | 20.1       | 12.9       | 14.7       | 10.3       | 165        |  |
|                | R2D2       | <b>0.0</b> | 1.8        | 4.0        | 5.8        | 5.4        | 4.9        | 9.4        | 9.8        | 20.5       | 12.9       | 13.4       | 194        |  |
|                | SuperPoint | <b>0.0</b> | 0.9        | <b>0.9</b> | 0.4        | 1.8        | 1.3        | 1.8        | 1.8        | 3.1        | 5.8        | 12.9       | 193        |  |
| Net-VLAD       | Sift       | <b>0.0</b> | <b>0.0</b> | 1.8        | 2.2        | 0.9        | 1.8        | 6.7        | 17.9       | 34.4       | 28.1       | 21.9       | <b>134</b> |  |
|                | D2-net     | 0.4        | 0.9        | 4.0        | 3.6        | 7.6        | 7.6        | 12.9       | 20.1       | 11.6       | 10.7       | 9.8        | 139        |  |
|                | R2D2       | <b>0.0</b> | 2.2        | 2.2        | 3.6        | 4.9        | 4.0        | 7.1        | 7.6        | 15.2       | 13.8       | 10.7       | 167        |  |
|                | SuperPoint | <b>0.0</b> | 0.4        | <b>0.9</b> | <b>0.0</b> | <b>0.0</b> | <b>0.0</b> | <b>0.0</b> | <b>0.4</b> | <b>1.3</b> | <b>3.1</b> | <b>8.5</b> | 166        |  |
| Wheel odometry |            | 9.8        |            |            |            |            |            |            |            |            |            |            |            |  |

Table A.2.1: Navigation failure rates over 5 repeated runs of the same route at each illumination level  $k$ . Smaller is better. PR = place recognition method, LF = local feature type, CT = computation time ( $ms$ ).

|          |            | Town10            |                |                |                |                |                |                |                |                |                |                |          |
|----------|------------|-------------------|----------------|----------------|----------------|----------------|----------------|----------------|----------------|----------------|----------------|----------------|----------|
| PR       | LF         | $k = 0$           | 1              | 2              | 3              | 4              | 5              | 6              | 7              | 8              | 9              | 10             |          |
|          |            | T1/T2/T3          | T1/T2/T3       | T1/T2/T3       | T1/T2/T3       | T1/T2/T3       | T1/T2/T3       | T1/T2/T3       | T1/T2/T3       | T1/T2/T3       | T1/T2/T3       | T1/T2/T3       | T1/T2/T3 |
| Ap-GeM   | Sift       | 95.2/96.4/99.6    | 93.1/93.1/94.4 | 89.5/90.3/92.7 | 89.5/91.1/92.3 | 87.1/87.9/91.5 | 89.1/90.7/91.9 | 76.6/79.0/83.9 | 54.8/60.5/67.3 | 12.5/16.5/33.5 | 1.6/2.4/8.1    | 0.0/0.4/3.6    |          |
|          | D2-net     | 94.7/98.4/99.2    | 87.5/90.3/93.5 | 84.2/88.7/91.9 | 85.0/90.3/92.7 | 81.9/87.1/92.7 | 75.8/81.9/90.7 | 46.8/53.6/65.3 | 6.5/12.5/24.2  | 0.0/0.0/1.2    | 0.0/0.0/0.4    | 0.0/0.0/0.0    |          |
|          | R2D2       | 93.1/94.7/99.6    | 91.5/91.9/94.4 | 88.3/90.7/92.3 | 87.4/88.7/91.5 | 85.5/87.9/90.3 | 84.7/87.5/89.9 | 75.8/78.2/83.5 | 51.8/56.7/63.6 | 15.7/21.4/31.5 | 2.0/2.8/5.6    | 0.4/0.8/2.8    |          |
|          | SuperPoint | 99.6/100.0/100.0  | 97.2/97.2/97.2 | 96.0/96.0/96.0 | 94.8/95.2/95.2 | 94.4/94.4/94.4 | 94.7/94.7/94.7 | 93.1/93.5/93.5 | 90.7/94.0/94.4 | 73.4/75.4/76.2 | 51.2/53.2/56.5 | 35.9/37.5/41.5 |          |
| Net-VLAD | Sift       | 96.4/97.2/100.0   | 95.6/96.8/98.0 | 92.7/94.0/94.8 | 89.6/91.2/93.2 | 87.9/90.7/93.5 | 89.1/91.1/92.3 | 75.4/77.8/85.1 | 58.5/63.3/68.5 | 12.9/17.3/35.5 | 1.6/4.4/9.3    | 0.4/0.4/2.0    |          |
|          | D2-net     | 97.2/99.6/100.0   | 89.5/91.9/96.0 | 86.7/89.5/94.0 | 85.1/89.1/94.0 | 83.1/88.3/92.7 | 78.9/85.8/90.3 | 45.2/58.5/69.4 | 10.5/14.5/28.6 | 0.0/0.0/0.8    | 0.0/0.0/0.4    | 0.0/0.0/0.0    |          |
|          | R2D2       | 91.6/92.8/99.6    | 92.7/94.4/96.4 | 88.7/91.1/92.7 | 86.3/89.1/91.1 | 85.9/89.1/90.7 | 86.3/89.5/91.5 | 76.6/80.6/87.1 | 55.1/59.9/66.0 | 14.1/20.2/33.9 | 2.0/2.8/6.5    | 0.4/0.8/2.0    |          |
|          | SuperPoint | 100.0/100.0/100.0 | 98.8/99.2/99.2 | 97.2/97.2/97.6 | 98.4/98.8/98.8 | 97.6/98.0/98.0 | 98.0/98.0/98.0 | 98.0/98.0/98.0 | 95.2/96.4/96.4 | 86.7/87.9/88.7 | 65.1/69.5/72.7 | 50.0/55.2/58.1 |          |

Table A.2.2: The localization recall rates for the reference paths at illumination levels  $k$  with thresholds T1 ( $\le 0.25m, \le 2^\circ$ ), T2 ( $\le 0.50m, \le 5^\circ$ ) and T3 ( $\le 5.00m, \le 10^\circ$ ).

### A.3. Viewpoint change results - Town01

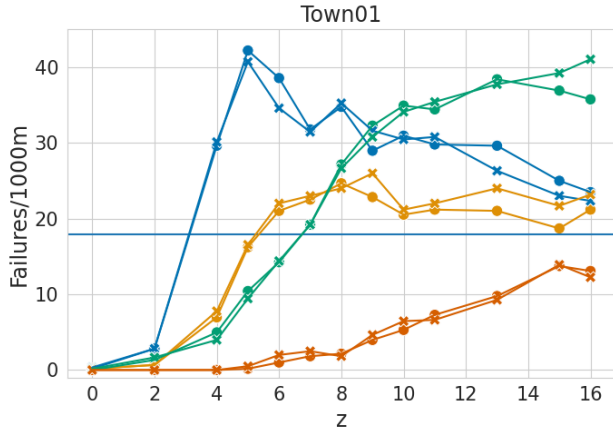

Figure A.3.1: Relationship between failure rate and elevation and pitch offsets  $z$ ,  $\theta$ . See Table A.3.1 (below) for elevation and pitch pairs.

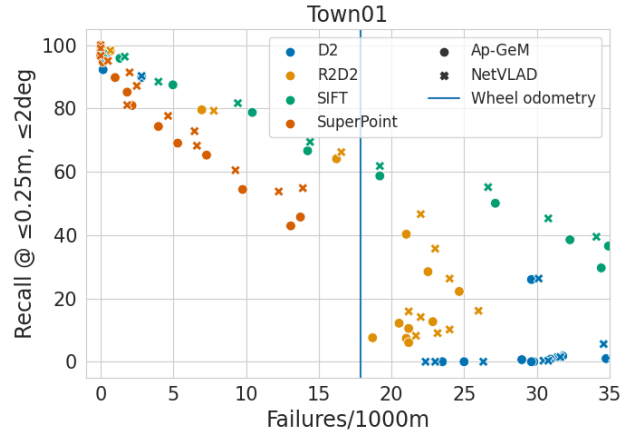

Figure A.3.2: Relationship between the failure rate and recall rate T1. Marker color and shape indicate feature type.

|                |            | Town01       |     |      |      |      |      |      |      |      |      |      |      |      |  |
|----------------|------------|--------------|-----|------|------|------|------|------|------|------|------|------|------|------|--|
| PR             | LF         | $z = 0$      | 2   | 4    | 5    | 6    | 7    | 8    | 9    | 10   | 11   | 13   | 15   | 16   |  |
|                |            | $\theta = 0$ | 10  | 22.5 | 27.5 | 32.5 | 35   | 37.5 | 40   | 40   | 40   | 40   | 40   | 40   |  |
| Ap-GeM         | Sift       | 0.0          | 1.3 | 5.0  | 10.4 | 14.2 | 19.2 | 27.2 | 32.3 | 34.9 | 34.4 | 38.4 | 36.9 | 35.8 |  |
|                | D2-net     | 0.2          | 2.8 | 29.6 | 42.2 | 38.6 | 31.8 | 34.8 | 29.0 | 31.0 | 29.8 | 29.6 | 25.0 | 23.5 |  |
|                | R2D2       | 0.2          | 0.7 | 7.0  | 16.2 | 21.0 | 22.5 | 24.7 | 22.8 | 20.5 | 21.2 | 21.0 | 18.7 | 21.2 |  |
|                | SuperPoint | 0.0          | 0.0 | 0.0  | 0.2  | 1.0  | 1.8  | 2.2  | 4.0  | 5.3  | 7.3  | 9.8  | 13.7 | 13.1 |  |
| Net-VLAD       | Sift       | 0.2          | 1.7 | 4.0  | 9.4  | 14.4 | 19.2 | 26.7 | 30.8 | 34.1 | 35.4 | 37.7 | 39.2 | 41.1 |  |
|                | D2-net     | 0.3          | 2.8 | 30.1 | 40.7 | 34.6 | 31.5 | 35.3 | 31.6 | 30.5 | 30.8 | 26.3 | 23.0 | 22.4 |  |
|                | R2D2       | 0.2          | 0.7 | 7.8  | 16.6 | 22.0 | 23.0 | 24.0 | 26.0 | 21.2 | 22.0 | 24.0 | 21.7 | 23.2 |  |
|                | SuperPoint | 0.0          | 0.0 | 0.0  | 0.5  | 2.0  | 2.5  | 1.8  | 4.6  | 6.5  | 6.6  | 9.3  | 13.9 | 12.3 |  |
| Wheel odometry |            | 17.9         |     |      |      |      |      |      |      |      |      |      |      |      |  |

Table A.3.1: Navigation failure rates over 5 repetitions of the same route at each gallery to-query camera pose (viewpoint) offset.  $z$  = elevation shift,  $\theta$  = pitch shift.

|          |            | Town01            |                |                |                |                |                |                |                |                |                |                |                |                |  |
|----------|------------|-------------------|----------------|----------------|----------------|----------------|----------------|----------------|----------------|----------------|----------------|----------------|----------------|----------------|--|
| PR       | LF         | $z = 0$           | 2              | 4              | 5              | 6              | 7              | 8              | 9              | 10             | 11             | 13             | 15             | 16             |  |
|          |            | $\theta = 0$      | 10             | 22.5           | 27.5           | 32.5           | 35             | 37.5           | 40             | 40             | 40             | 40             | 40             | 40             |  |
|          |            | T1/T2/T3          | T1/T2/T3       | T1/T2/T3       | T1/T2/T3       | T1/T2/T3       | T1/T2/T3       | T1/T2/T3       | T1/T2/T3       | T1/T2/T3       | T1/T2/T3       | T1/T2/T3       | T1/T2/T3       | T1/T2/T3       |  |
| Ap-GeM   | Sift       | 98.0/98.2/99.8    | 95.9/96.9/97.9 | 87.5/89.3/93.1 | 78.8/83.4/88.3 | 66.7/72.1/78.8 | 58.7/65.8/74.0 | 50.1/57.8/65.7 | 38.6/47.1/55.8 | 36.6/41.5/49.2 | 29.7/38.4/46.3 | 21.4/26.5/33.3 | 17.8/21.9/31.2 | 17.4/22.2/29.7 |  |
|          | D2-net     | 92.3/95.7/99.8    | 89.8/95.2/98.2 | 26.0/46.4/76.8 | 10.3/21.8/53.9 | 4.1/9.5/23.5   | 1.8/8.2/21.2   | 1.0/3.8/13.5   | 0.7/2.3/8.7    | 0.8/1.3/8.1    | 0.0/0.3/5.6    | 0.0/0.2/2.3    | 0.0/0.0/1.0    | 0.0/0.0/0.5    |  |
|          | R2D2       | 98.0/98.4/100.0   | 98.0/98.0/98.5 | 79.6/81.4/88.8 | 64.1/67.6/75.5 | 40.3/49.7/59.9 | 28.5/38.5/50.2 | 22.2/29.9/44.1 | 12.7/21.2/36.0 | 12.2/20.2/31.7 | 10.5/18.3/28.6 | 7.4/14.8/22.9  | 7.6/13.0/21.1  | 6.1/11.5/21.1  |  |
|          | SuperPoint | 100.0/100.0/100.0 | 99.5/99.5/99.7 | 96.7/96.7/98.5 | 94.7/94.9/97.4 | 89.8/90.3/94.1 | 85.2/86.8/92.4 | 81.0/83.3/88.2 | 74.3/76.6/83.9 | 69.1/72.7/80.1 | 65.3/70.1/76.0 | 54.4/60.7/66.4 | 45.7/52.3/57.1 | 42.9/49.8/54.9 |  |
| Net-VLAD | Sift       | 97.4/98.5/99.8    | 96.4/96.9/97.9 | 88.5/90.1/93.8 | 81.7/85.2/89.3 | 69.5/75.5/82.9 | 61.8/67.3/73.5 | 55.2/61.1/68.6 | 45.3/52.2/63.3 | 39.5/46.9/55.1 | 38.6/44.7/52.2 | 26.5/33.8/43.8 | 23.6/27.8/36.6 | 20.1/23.9/30.8 |  |
|          | D2-net     | 96.1/96.9/99.7    | 90.3/96.7/98.7 | 26.3/46.6/78.5 | 12.3/21.2/57.2 | 5.6/11.3/28.2  | 1.5/7.4/23.0   | 1.2/4.8/16.8   | 1.5/3.0/14.1   | 0.3/1.3/8.9    | 0.3/0.8/5.9    | 0.0/0.0/3.3    | 0.0/0.0/1.3    | 0.0/0.0/1.6    |  |
|          | R2D2       | 98.4/98.5/99.7    | 98.4/98.4/99.0 | 79.3/81.1/88.7 | 66.2/70.8/79.3 | 46.6/53.5/63.4 | 35.7/44.1/53.3 | 26.3/33.3/45.5 | 16.1/25.6/38.6 | 15.9/23.0/33.4 | 14.1/19.0/29.2 | 10.2/17.2/23.8 | 8.2/12.6/21.2  | 9.0/12.8/20.2  |  |
|          | SuperPoint | 100.0/100.0/100.0 | 99.0/99.0/99.2 | 96.7/96.7/98.0 | 95.1/95.1/97.4 | 91.4/92.3/96.2 | 87.2/88.3/95.1 | 81.1/84.9/91.4 | 77.7/81.1/88.3 | 72.9/77.0/84.5 | 68.3/73.8/79.4 | 60.5/68.3/73.7 | 54.9/66.1/71.3 | 53.8/62.0/68.1 |  |

Table A.3.2: The localization recall rates for the reference paths at elevation and pitch changes  $z$ ,  $\theta$  with thresholds T1 ( $\le 0.25m, \le 2^\circ$ ), T2 ( $\le 0.50m, \le 5^\circ$ ) and T3 ( $\le 5.00m, \le 10^\circ$ ).

### A.4. Weather change results - Town10

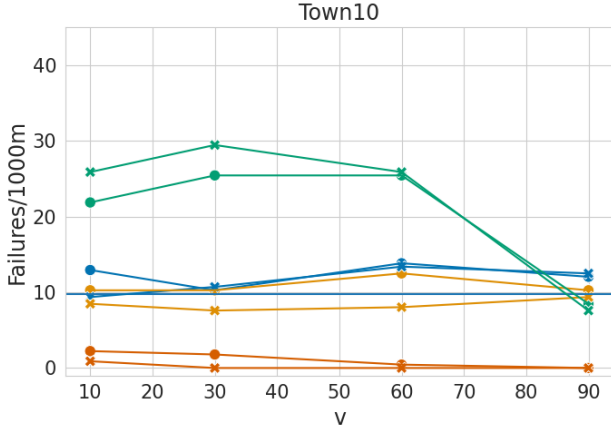

Figure A.4.1: Relationship between failure rate and visual range  $v$ .

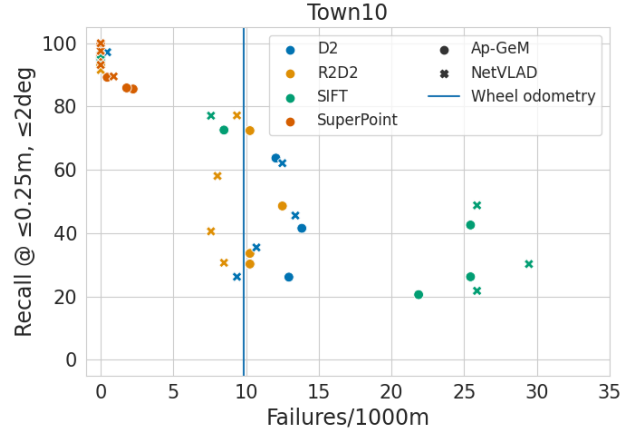

Figure A.4.2: Relationship between the failure rate and recall rate T1. Marker color and shape indicate feature type.

|                |            | Town10     |            |            |            |
|----------------|------------|------------|------------|------------|------------|
| PR             | LF         | $v = 90$   | 60         | 30         | 10         |
| Ap-GeM         | Sift       | 8.5        | 25.4       | 25.4       | 21.9       |
|                | D2-net     | 12.1       | 13.8       | 10.3       | 12.9       |
|                | R2D2       | 10.3       | 12.5       | 10.3       | 10.3       |
|                | SuperPoint | <b>0.0</b> | 0.4        | 1.8        | 2.2        |
| Net-VLAD       | Sift       | 7.6        | 25.9       | 29.5       | 25.9       |
|                | D2-net     | 12.5       | 13.4       | 10.7       | 9.4        |
|                | R2D2       | 9.4        | 8.0        | 7.6        | 8.5        |
|                | SuperPoint | <b>0.0</b> | <b>0.0</b> | <b>0.0</b> | <b>0.9</b> |
| Wheel odometry |            | 9.8        |            |            |            |

Table A.4.1: Failure rates at gallery-to-query weather (visibility) changes  $v$ .

|          |            | Town10                    |                           |                           |                           |
|----------|------------|---------------------------|---------------------------|---------------------------|---------------------------|
| PR       | LF         | $v = 90$                  | 60                        | 30                        | 10                        |
|          |            | T1 / T2 / T3              |
| Ap-GeM   | Sift       | 72.6 / 79.0 / 86.3        | 42.6 / 43.0 / 49.0        | 26.2 / 28.2 / 31.5        | 20.6 / 23.4 / 28.2        |
|          | D2-net     | 63.7 / 71.0 / 81.5        | 41.5 / 44.4 / 54.8        | 30.2 / 33.1 / 40.3        | 26.1 / 29.7 / 35.3        |
|          | R2D2       | 72.4 / 76.8 / 82.8        | 48.6 / 51.4 / 56.3        | 33.6 / 36.8 / 40.9        | 30.2 / 31.5 / 34.3        |
|          | SuperPoint | 96.0 / 96.4 / 96.4        | 89.2 / 90.0 / 90.0        | 85.9 / 86.7 / 88.7        | 85.5 / 86.7 / 87.6        |
| Net-VLAD | Sift       | 77.1 / 82.3 / 88.8        | 48.8 / 51.6 / 56.5        | 30.2 / 34.3 / 37.9        | 21.8 / 23.4 / 28.2        |
|          | D2-net     | 62.1 / 70.6 / 82.3        | 45.6 / 50.8 / 63.3        | 35.5 / 37.1 / 44.0        | 26.2 / 31.5 / 39.1        |
|          | R2D2       | 77.2 / 81.2 / 86.8        | 58.1 / 59.7 / 64.1        | 40.6 / 42.2 / 46.6        | 30.6 / 34.7 / 39.5        |
|          | SuperPoint | <b>97.6 / 97.6 / 97.6</b> | <b>97.6 / 97.6 / 97.6</b> | <b>93.1 / 94.0 / 94.0</b> | <b>89.5 / 90.7 / 91.5</b> |

Table A.4.2: The localization recall rates for the reference paths at visual ranges  $v$  with thresholds T1 ( $\le 0.25m, \le 2^\circ$ ), T2 ( $\le 0.50m, \le 5^\circ$ ) and T3 ( $\le 5.00m, \le 10^\circ$ ).
